# Supplementary material for: Behavior of Chemokine Receptor 6 (CXCR6) in Complex with CXCL16 Soluble form Chemokine by Molecular Dynamic Simulations: General Protein‒Ligand Interaction Model and 3D-QSAR Studies of Synthetic Antagonists
Source: MDPI journal article supplement (doi:10.3390/life11040346), 2021-04-15
Supplement: s1 [file s1]

# Behavior of Chemokine Receptor 6 (CXCR6) in Complex with CXCL16 Soluble form Chemokine by Molecular Dynamic Simulations: General Protein–Ligand Interaction Model and 3D-QSAR Studies of Synthetic Antagonists

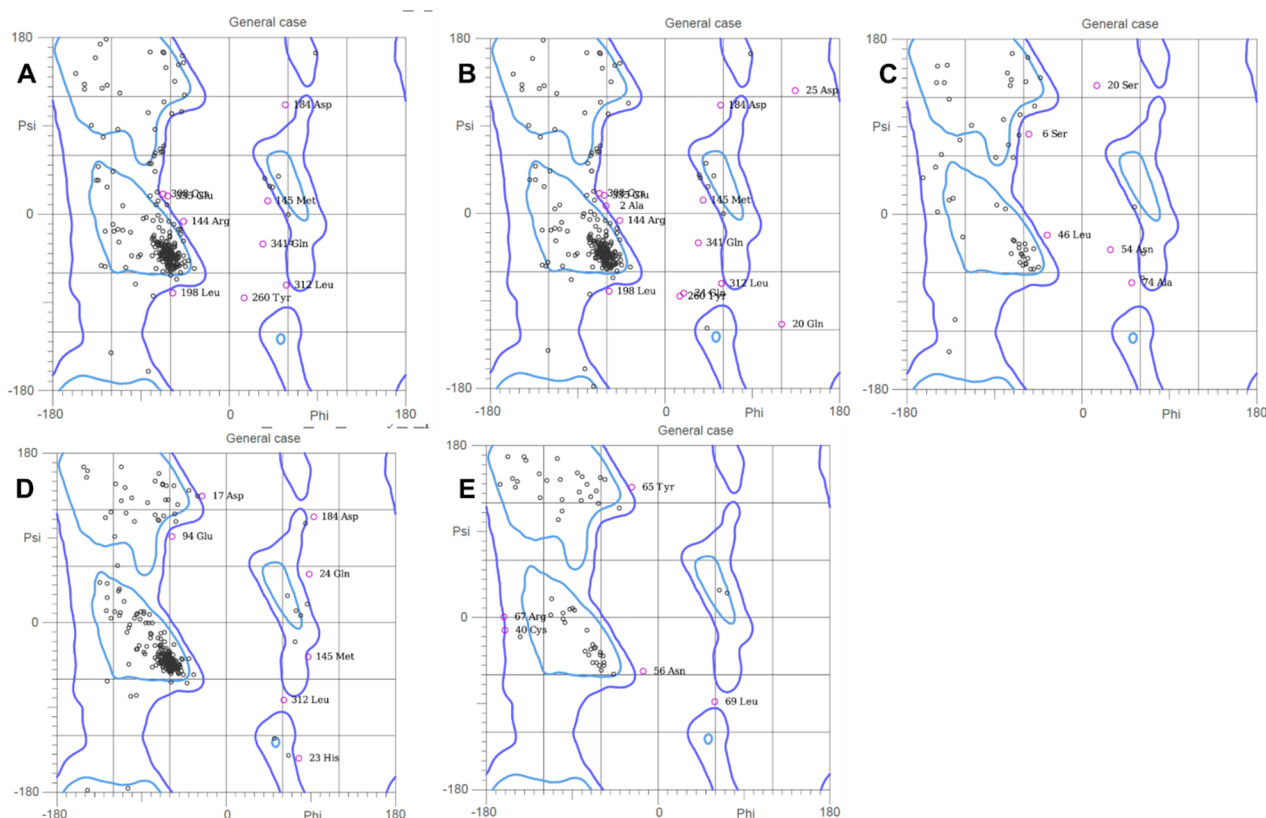

**Figure S1.** Ramachandran plots. A) CXCR6-M1, B) CXCR6-reoriented, C) CXCL16s, D) CXCR6-minimized, E) CXCL16s cluster1.

| <b>A</b>      |                                           |                                    |                 |              |            |     |
|---------------|-------------------------------------------|------------------------------------|-----------------|--------------|------------|-----|
| Score         | Expect                                    | Method                             | Identities      | Positives    | Gaps       |     |
| 175 bits(444) | 1e-56                                     | Compositional matrix adjust.       | 107/308(35%)    | 171/308(55%) | 18/308(5%) |     |
| Query 2       | DYQVSSPIYDINYYTSEPCQKINVKQIAARLLPPLYSLVFI | GFVGNMLVILILINCKRL                 | 61              |              |            |     |
| Sbjct 5       | DYHEDYGFSSFNDSQEEHQ--DFLQFSKVFLPCMYLVFV   | CGLVGNLSLVVISIFYHKL                | 62              |              |            |     |
| Query 62      | KSMTDIYLLNLAISDLFFLLTVPFWAHYAAAQWDFGNTMC  | QLLTGLYFIGFFSGIFFIIL               | 121             |              |            |     |
| Sbjct 63      | QSLTDVFLVNLPLADLVFVCTLPFWAYAGIHEWVFGQVM   | CKSLLGIYTNFYTSMILTC                | 122             |              |            |     |
| Query 122     | LTIDRYLAVVHAVFAL--KARTVTFGVVTSVITWVAVFAS  | LPGIIFTRSQKEGLHYTCS                | 179             |              |            |     |
| Sbjct 123     | ITVDRFIVVVKATKAYNQAKRMTGKVTSLLIWVISLLVSL  | PQIIYGNVFNLD-KLICG                 | 181             |              |            |     |
| Query 180     | SHFPYSQYQFWKNFQTLKIVILGLVLP               | LLVMVICYSGILKTL                    | RCRNEKKRHR      | AVRLIFT      |            | 239 |
| Sbjct 182     | YHDEAISTVVLATQMT-----LGFFLPLL             | TMIVCYSVIKTL                       | LHAGGFQK-HRSLKI | IFL          |            | 235 |
| Query 240     | IMIVYFLFWAPYNIV-LLNLTQFEFFGLNNCSSNR       | LDQAMQVTETLGMTHCCINPIYA            | 298             |              |            |     |
| Sbjct 236     | VMAVFLLTQMPFNLKFI                         | RSTHWEYYAMTS-----FHYTIMVTEAIAYLRAC | LNPLVYA         |              |            | 289 |
| Query 299     | FVGEKFRN                                  | 306                                |                 |              |            |     |
| Sbjct 290     | FV KFR                                    | 297                                |                 |              |            |     |
| <b>B</b>      |                                           |                                    |                 |              |            |     |
| Score         | Expect                                    | Method                             | Identities      | Positives    | Gaps       |     |
| 20.0 bits(40) | 0.001                                     | Compositional matrix adjust.       | 10/32(31%)      | 18/32(56%)   | 3/32(9%)   |     |
| Query 37      | IFHTKKKL---SVCANPKQTWVKYIVRLLSKK          | 65                                 |                 |              |            |     |
| Sbjct 38      | LYYTRFQLLSWSVCGGNKDPWVQELMSCLDLK          | 69                                 |                 |              |            |     |

**Figure S2.** Sequence alignment by BLAST A) Alignment between CCR5 and CXCR6 and B) Alignment between CCL20 and CXCL16s.

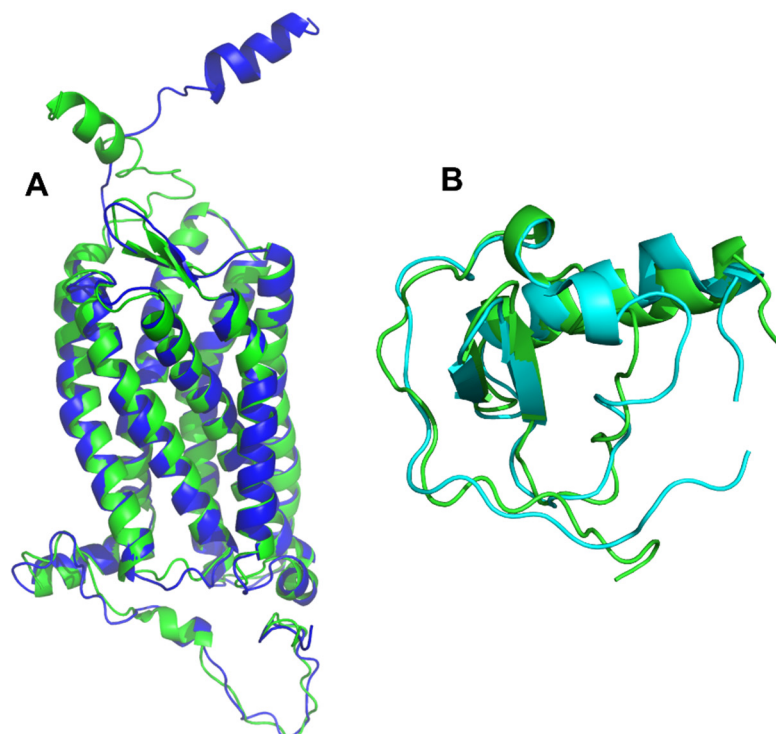

**Figure 3.** Alignment of CXCR6 and CXCL16s structures. A) CXCR6-M1 (green) and CXCR6-mini-mized (Blue), B) CXCL16s-M1 (green) and CXCL16s-C1 (turquoise).

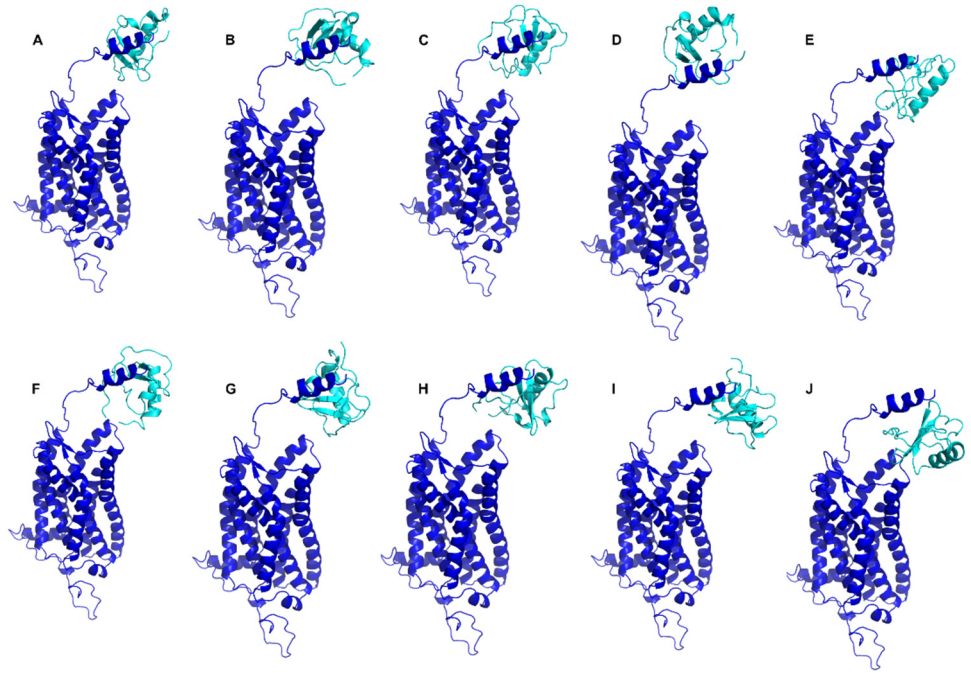

**Figure 4.** First ten models obtained in ClusPro server. A) model0, B) model1, C) model2, D) model3, E) model4, F) model5, G) model6, H) model7, I) model8, and J) model9. The model 0 was used to subsequent simulations.

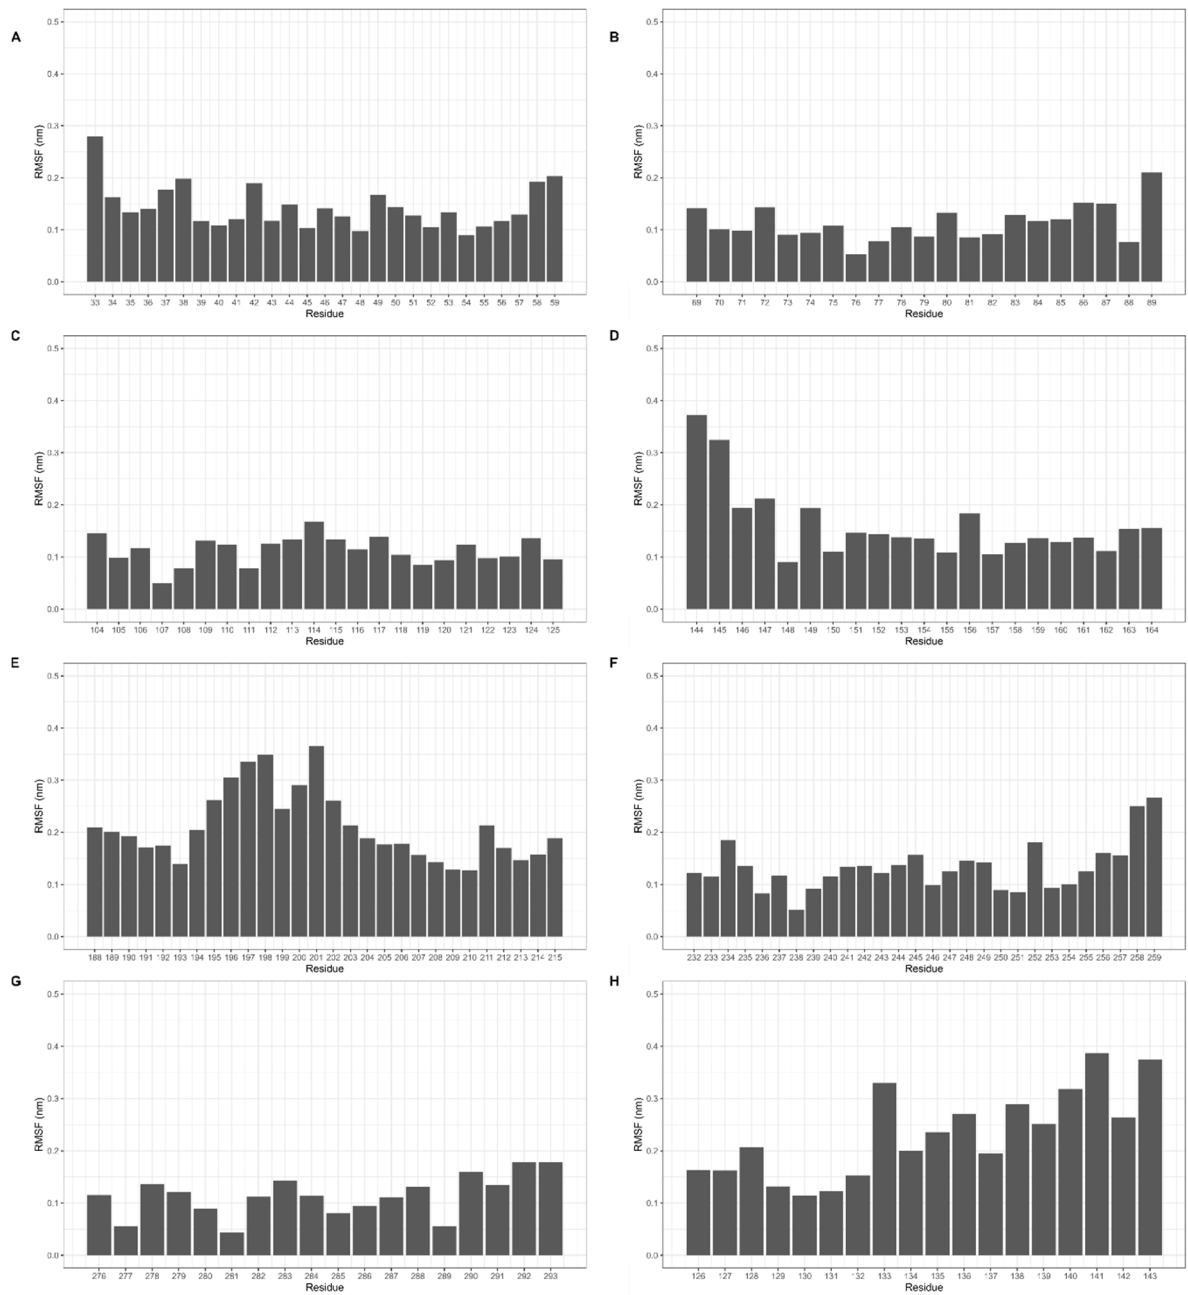

**Figure S5.** RMSF of CXCR6 CG-MD. A) TM1, B) TM2, C) TM3, D) TM4, E) TM5, F) TM6, G) TM7, H) ICL2.

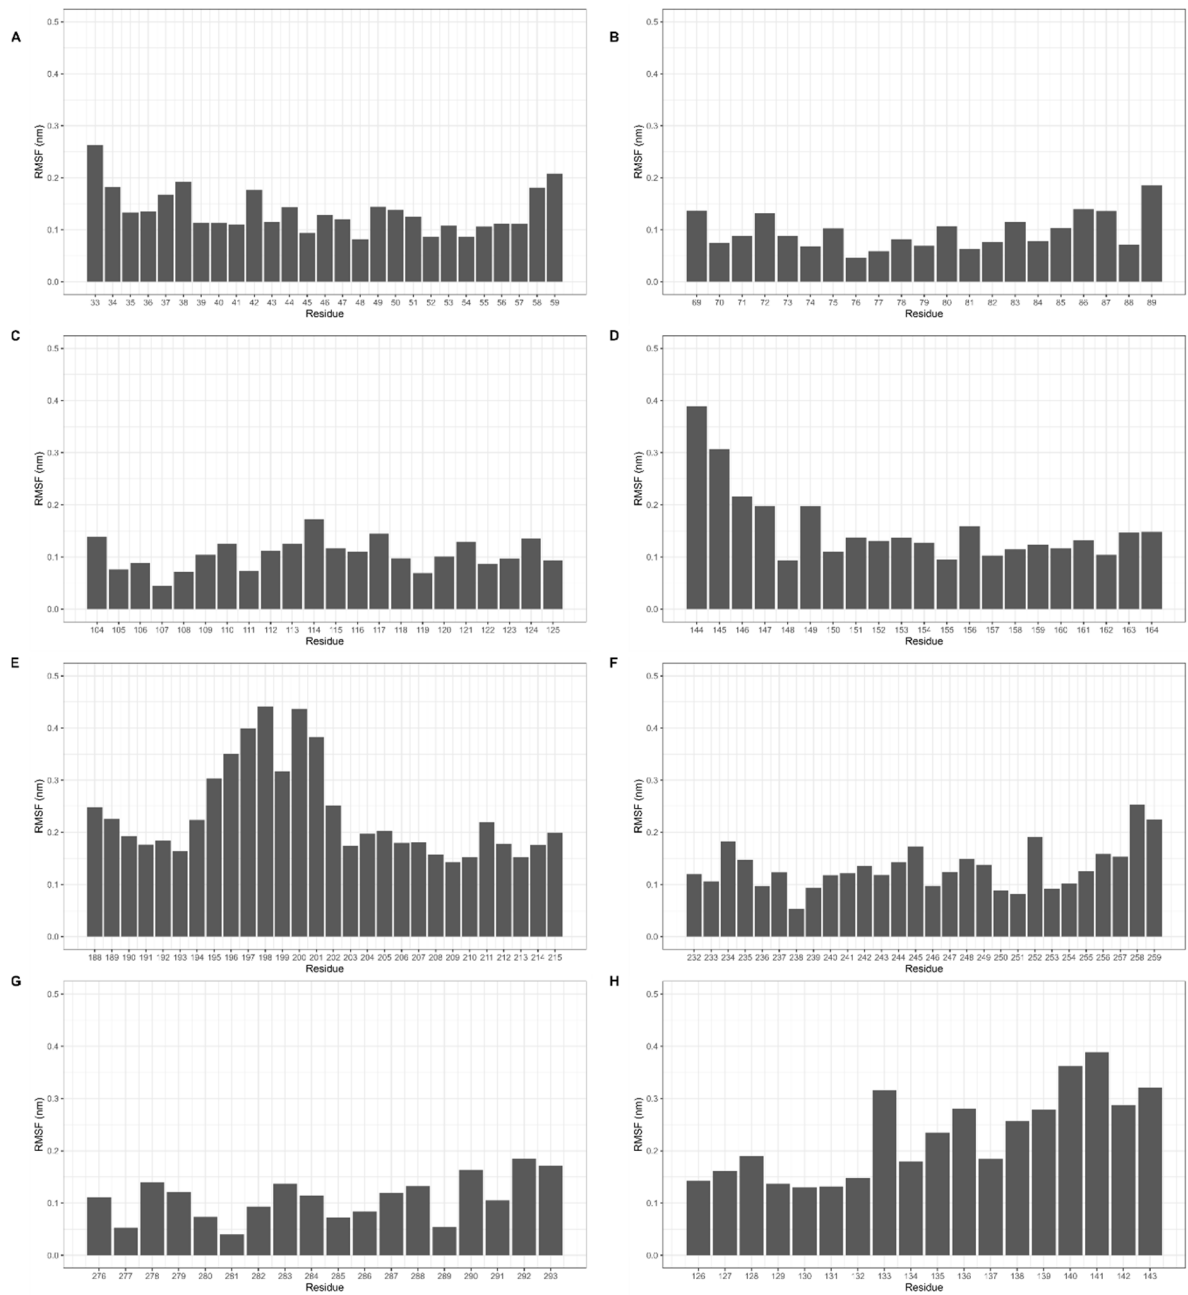

**Figure S6.** RMSF of CXCR6-CXCL16s CG-MD. A) TM1, B) TM2, C) TM3, D) TM4, E) TM5, F) TM6, G) TM7, H) ICL2.

**Table S1.** Polar interactions between transmembrane segments in CXCR6 CG-MD.

| 0 ns   | TM1 | TM2 | TM3      | TM4                    | TM5       | TM6                          | TM7                    |
|--------|-----|-----|----------|------------------------|-----------|------------------------------|------------------------|
| TM1    | -   | -   | -        | -                      | -         | -                            | -                      |
| TM2    | -   | -   | -        | N72-S152               | -         | -                            | D77-R280, N284         |
| TM3    | -   | -   | -        | I111-S159              | Y114-T194 | -                            | S116-R280              |
| TM4    | -   | -   | -        | -                      | -         | -                            | -                      |
| TM5    | -   | -   | -        | -                      | -         | Q195-Q244                    | -                      |
| TM6    | -   | -   | -        | -                      | -         | -                            | -                      |
| 100 ns | TM1 | TM2 | TM3      | TM4                    | TM5       | TM6                          | TM7                    |
| TM1    | -   | -   | -        | -                      | -         | -                            | N79-R285               |
| TM2    | -   | -   | A76-N112 | N72-W156               | -         | -                            | A76, D77-R280          |
| TM3    | -   | -   | -        | -                      | T110-V162 | T124-T206                    | N112-R280              |
| TM4    | -   | -   | -        | -                      | -         | -                            | -                      |
| TM5    | -   | -   | -        | -                      | -         | Q195-N248<br>G199-Q244       | -                      |
| TM6    | -   | -   | -        | -                      | -         | -                            | T243-R280              |
| 200 ns | TM1 | TM2 | TM3      | TM4                    | TM5       | TM6                          | TM7                    |
| TM1    | -   | -   | -        | -                      | -         | -                            | -                      |
| TM2    | -   | -   | D77-N112 | -                      | -         | -                            | D77-R280               |
| TM3    | -   | -   | -        | T110-S163<br>I111-S159 | -         | -                            | -                      |
| TM4    | -   | -   | -        | -                      | -         | -                            | -                      |
| TM5    | -   | -   | -        | -                      | -         | S188-k251, S255<br>Q195-Q244 | -                      |
| TM6    | -   | -   | -        | -                      | -         | -                            | T243-R280              |
| 300 ns | TM1 | TM2 | TM3      | TM4                    | TM5       | TM6                          | TM7                    |
| TM1    | -   | -   | -        | -                      | -         | -                            | -                      |
| TM2    | -   | -   | A77-T115 | -                      | -         | -                            | D77-R280               |
| TM3    | -   | -   | -        | -                      | -         | S116-F241                    | Y109-Y278<br>N112-R280 |
| TM4    | -   | -   | -        | -                      | -         | -                            | -                      |
| TM5    | -   | -   | -        | -                      | -         | S188-K251, R254              | -                      |
| TM6    | -   | -   | -        | -                      | -         | -                            | T243-R280              |

| 400 ns | TM1 | TM2 | TM3                       | TM4                    | TM5 | TM6                    | TM7       |
|--------|-----|-----|---------------------------|------------------------|-----|------------------------|-----------|
| TM1    | -   | -   | -                         | -                      | -   | -                      | N49-P285  |
| TM2    | -   | -   | D77. F80-N112<br>W87-Y109 | -                      | -   | -                      | D77-R280  |
| TM3    | -   | -   | -                         | T110-S163<br>I111-S159 | -   | S116-F240              | N112-R280 |
| TM4    | -   | -   | -                         | -                      | -   | -                      | -         |
| TM5    | -   | -   | -                         | -                      | -   | S188-K251<br>Q195-N248 | -         |
| TM6    | -   | -   | -                         | -                      | -   | -                      | -         |

| 500 ns | TM 1 | TM 2 | TM3                                       | TM4       | TM5       | TM6                             | TM7               |
|--------|------|------|-------------------------------------------|-----------|-----------|---------------------------------|-------------------|
| TM1    | -    | -    | -                                         | -         | -         | -                               | -                 |
| TM2    | -    | -    | A76-N112,<br>T115<br>D77-N112<br>W87-Y109 | -         | -         | -                               | D77-R280,<br>N284 |
| TM3    | -    | -    | -                                         | T110-S163 | T110-Q195 | -                               | -                 |
| TM4    | -    | -    | -                                         | -         | -         | -                               | -                 |
| TM5    | -    | -    | -                                         | -         | -         | S188-R254,<br>S255<br>Q195-Q244 | -                 |
| TM6    | -    | -    | -                                         | -         | -         | -                               | -                 |

| 600 ns | TM1 | TM2 | TM3 | TM4       | TM5 | TM6                                       | TM7                    |
|--------|-----|-----|-----|-----------|-----|-------------------------------------------|------------------------|
| TM1    | -   | -   | -   | -         | -   | -                                         | N49-P285               |
| TM2    | -   | -   | -   | -         | -   | -                                         | D77-R280               |
| TM3    | -   | -   | -   | T110-S163 | -   | S116-F240                                 | Y109-Y278<br>N112-R280 |
| TM4    | -   | -   | -   | -         | -   | -                                         | -                      |
| TM5    | -   | -   | -   | -         | -   | S188-R254<br>Q195-Q244, N248<br>Y211-F234 | -                      |
| TM6    | -   | -   | -   | -         | -   | -                                         | -                      |

| 700 ns | TM 1 | TM 2 | TM3           | TM4 | TM5 | TM6 | TM7               |
|--------|------|------|---------------|-----|-----|-----|-------------------|
| TM1    | -    | -    | -             | -   | -   | -   | -                 |
| TM2    | -    | -    | A76, D77-N112 | -   | -   | -   | D77-R280,<br>N284 |

|     |   |   |   |                              |           |   |                                  |           |
|-----|---|---|---|------------------------------|-----------|---|----------------------------------|-----------|
| TM3 | - | - | - | L106, T110-S163<br>T110-S159 |           | - | F113-Q244                        | -         |
| TM4 | - | - | - | -                            | S159-Q195 | - | -                                | -         |
| TM5 | - | - | - | -                            | -         | - | S188-S255<br>Q195-Q244,<br>N2480 | -         |
| TM6 | - | - | - | -                            | -         | - | -                                | T243-R280 |

| 800 ns | TM1 | TM2 | TM3 | TM4 | TM5       | TM6                    | TM7       |
|--------|-----|-----|-----|-----|-----------|------------------------|-----------|
| TM1    | -   | -   | -   | -   | -         | -                      | N49-P285  |
| TM2    | -   | -   | -   | -   | -         | -                      | D77-R280  |
| TM3    | -   | -   | -   | -   | Y114-Q194 | F113-Q245              | N112-R280 |
| TM4    | -   | -   | -   | -   | -         | -                      | -         |
| TM5    | -   | -   | -   | -   | -         | S188-R254<br>Q195-N248 | -         |
| TM6    | -   | -   | -   | -   | -         | -                      | V236-N284 |

| 900 ns | TM1 | TM2 | TM3 | TM4      | TM5                    | TM6                    | TM7            |
|--------|-----|-----|-----|----------|------------------------|------------------------|----------------|
| TM1    | -   | -   | -   | -        | -                      | -                      | N49-P285       |
| TM2    | -   | -   | -   | N72-S152 | -                      | -                      | D77-R280, N284 |
| TM3    | -   | -   | -   | -        | Y114-T194<br>T124-T206 | S116-Q244              | -              |
| TM4    | -   | -   | -   | -        | -                      | -                      | -              |
| TM5    | -   | -   | -   | -        | -                      | Q195-N248<br>Y211-F234 | -              |
| TM6    | -   | -   | -   | -        | -                      | -                      | -              |

| 1000 ns | TM1 | TM2 | TM3 | TM4 | TM5 | TM6 | TM7           |
|---------|-----|-----|-----|-----|-----|-----|---------------|
| TM1     | -   | -   | -   | -   | -   | -   | -             |
| TM2     | -   | -   | -   | -   | -   | -   | D77-R280, 284 |
| TM3     | -   | -   | -   | -   | -   | -   | -             |
| TM4     | -   | -   | -   | -   | -   | -   | -             |
| TM5     | -   | -   | -   | -   | -   | -   | -             |
| TM6     | -   | -   | -   | -   | -   | -   | F240-R280     |



**Table S2.** Polar interactions of DRF motif in CXCR6 CG-MD.

| 0 ns        |      | 100                     | 200                    | 300                     | 400            | 500                              | 600                              | 700                      | 800                      | 900                             | 1000                              |
|-------------|------|-------------------------|------------------------|-------------------------|----------------|----------------------------------|----------------------------------|--------------------------|--------------------------|---------------------------------|-----------------------------------|
| <b>D126</b> | C122 | *Q141,<br>C122,<br>I129 | C122,<br>I129,<br>V130 | *K143,<br>C122,<br>V130 | *K143,<br>C122 | *K143,<br>C122,<br>I129,<br>V130 | *K143,<br>C122,<br>I129,<br>V130 | *K143,<br>C122           | *Y138,<br>*K143,<br>C122 | C122,<br>V131,<br>Q140,<br>Q141 | *Q140,<br>*K143,<br>C122,<br>V130 |
| <b>R127</b> | T124 | I123,<br>T124           | T124                   | *I123,<br>T124,<br>V131 | I124           | *Q225,<br>I123                   | I123                             | *Q141,<br>*F224,<br>I123 | *Q141,<br>I123           | *Q141,<br>*F224                 | *Q141,<br>I123,<br>T124           |
| <b>F128</b> | T124 | T1T12<br>4,<br>V132     | T124                   | T124,<br>V131           | V125           | V125,<br>V132                    | V125                             | T124,<br>V125            | T124,<br>V125            | T124                            | T124,<br>V131                     |

\*Interactions between sidechain of DRF residue. Residues non-polar interacts although mainchain.



|      |                      |      |     |
|------|----------------------|------|-----|
| E8   | R57,<br>*H61,<br>W79 | Y261 | S48 |
| H7   | S33,<br>R57          |      |     |
| Y10  | G41                  |      |     |
| D9   | G41,<br>R73          |      |     |
| Y6   | G36                  |      |     |
| D176 | G32,<br>T35          |      |     |
| K177 | G32                  |      |     |

---

\*Salt bridges interactions.

**Table S4.** Polar interactions between transmembrane segments in CXCR6-CXCL16 CG-MD.

| 0 ns   | TM1 | TM2     | TM3           | TM4             | TM5       | TM6                          | TM7                    |
|--------|-----|---------|---------------|-----------------|-----------|------------------------------|------------------------|
| TM1    | -   | -       | -             | -               | -         | -                            | -                      |
| TM2    | -   | -       | -             | -               | -         | -                            | D77-R280<br>T83-Y278   |
| TM3    | -   | -       | -             | G107, T110-S163 | -         | Y110-K251                    | -                      |
| TM4    | -   | -       | -             | -               | -         | -                            | -                      |
| TM5    | -   | -       | -             | -               | -         | L192, Q195-N248              | -                      |
| TM6    | -   | -       | -             | -               | -         | -                            | -                      |
| 100 ns | TM1 | TM2     | TM3           | TM4             | TM5       | TM6                          | TM7                    |
| TM1    | -   | -       | -             | -               | -         | -                            | N49-O285               |
| TM2    | -   | -       | -             | N72-S152        | -         | -                            | D77-R280, N284         |
| TM3    | -   | -       | -             | T110-S163       | Y114-T194 | F133-Q244                    | -                      |
| TM4    | -   | -       | -             | -               | -         | -                            | -                      |
| TM5    | -   | -       | -             | -               | -         | -                            | -                      |
| TM6    | -   | -       | -             | -               | -         | -                            | T243, Q244-280         |
| 200 ns | TM1 | TM2     | TM3           | TM4             | TM5       | TM6                          | TM7                    |
| TM1    | -   | N49-D77 | -             | -               | -         | -                            | -                      |
| TM2    | -   | -       | A76, D77-N112 | -               | -         | -                            | D77-R280               |
| TM3    | -   | -       | -             | -               | -         | N112-Q244                    | N112-R280              |
| TM4    | -   | -       | -             | -               | -         | -                            | -                      |
| TM5    | -   | -       | -             | -               | -         | -                            | -                      |
| TM6    | -   | -       | -             | -               | -         | -                            | V236-N284<br>T243-R280 |
| 300 ns | TM1 | TM2     | TM3           | TM4             | TM5       | TM6                          | TM7                    |
| TM1    | -   | -       | -             | -               | -         | -                            | N49-P285               |
| TM2    | -   | -       | -             | -               | -         | -                            | D77-R280, N284         |
| TM3    | -   | -       | -             | -               | Y114-T197 | Y109-K251<br>S116-Q244       | -                      |
| TM4    | -   | -       | -             | -               | -         | -                            | -                      |
| TM5    | -   | -       | -             | -               | -         | Q195, F200-N248<br>Y211-F234 | -                      |
| TM6    | -   | -       | -             | -               | -         | -                            | T243-R280              |

| 400 ns | TM1 | TM2 | TM3      | TM4 | TM5 | TM6                    | TM7       |
|--------|-----|-----|----------|-----|-----|------------------------|-----------|
| TM1    | -   | -   | -        | -   | -   | -                      | -         |
| TM2    | -   | -   | W87-Y109 | -   | -   | -                      | D77-R280  |
| TM3    | -   | -   | -        | -   | -   | N112-Q244<br>S116-F240 | -         |
| TM4    | -   | -   | -        | -   | -   | -                      | -         |
| TM5    | -   | -   | -        | -   | -   | -                      | -         |
| TM6    | -   | -   | -        | -   | -   | -                      | T243-R280 |

| 500 ns | TM1 | TM2 | TM3      | TM4             | TM5 | TM6       | TM7                  |
|--------|-----|-----|----------|-----------------|-----|-----------|----------------------|
| TM1    | -   | -   | -        | -               | -   | -         | Y38-Y278<br>N49-P285 |
| TM2    | -   | -   | T83-N112 | N72-S152        | -   | -         | D77-N284             |
| TM3    | -   | -   | -        | G107, T110-S163 | -   | -         | -                    |
| TM4    | -   | -   | -        | -               | -   | -         | -                    |
| TM5    | -   | -   | -        | -               | -   | G199-Q244 | -                    |
| TM6    | -   | -   | -        | -               | -   | -         | Q244-R280            |

| 600 ns | TM1 | TM2     | TM3      | TM4       | TM5                          | TM6             | TM7       |
|--------|-----|---------|----------|-----------|------------------------------|-----------------|-----------|
| TM1    | -   | S56-L70 | -        | -         | -                            | -               | -         |
| TM2    | -   | -       | A76-S116 | N72-S152  | -                            | -               | D77-R280  |
| TM3    | -   | -       | -        | T115-S159 | T110-Q195<br>M117, T121-T206 | M117, F113-Q244 | -         |
| TM4    | -   | -       | -        | -         | -                            | -               | -         |
| TM5    | -   | -       | -        | -         | -                            | S188-R254       | -         |
| TM6    | -   | -       | -        | -         | -                            | -               | T243-R280 |

| 700 ns | TM1 | TM2 | TM3 | TM4      | TM5 | TM6       | TM7       |
|--------|-----|-----|-----|----------|-----|-----------|-----------|
| TM1    | -   | -   | -   | -        | -   | -         | -         |
| TM2    | -   | -   | -   | -        | -   | -         | D77-R280  |
| TM3    | -   | -   | -   | T11-S159 | -   | F113-Q244 | -         |
| TM4    | -   | -   | -   | -        | -   | -         | -         |
| TM5    | -   | -   | -   | -        | -   | L198-N248 | -         |
| TM6    | -   | -   | -   | -        | -   | -         | K251-Y278 |

| 800 ns | TM1 | TM2 | TM3 | TM4                                 | TM5       | TM6                    | TM7                    |
|--------|-----|-----|-----|-------------------------------------|-----------|------------------------|------------------------|
| TM1    | -   | -   | -   | -                                   | -         | -                      | -                      |
| TM2    | -   | -   | -   | N72-S152                            | -         | -                      | D77-R280               |
| TM3    | -   | -   | -   | T110-S163<br>I111-S159<br>T115-I155 | T121-T206 | F113-Q244<br>Y114-N248 | -                      |
| TM4    | -   | -   | -   | -                                   | -         | -                      | -                      |
| TM5    | -   | -   | -   | -                                   | -         | S188-S255              | -                      |
| TM6    | -   | -   | -   | -                                   | -         | -                      | T243-R280<br>I232-Y288 |

| 900 ns | TM1 | TM2     | TM3 | TM4       | TM5       | TM6                          | TM7      |
|--------|-----|---------|-----|-----------|-----------|------------------------------|----------|
| TM1    | -   | N49-L78 | -   | -         | -         | -                            | -        |
| TM2    | -   | -       | -   | -         | -         | -                            | D77-R280 |
| TM3    | -   | -       | -   | I111-S159 | T121-T206 | -                            | -        |
| TM4    | -   | -       | -   | -         | -         | -                            | -        |
| TM5    | -   | -       | -   | -         | -         | S188-S255<br>L198, G199-N248 | -        |
| TM6    | -   | -       | -   | -         | -         | -                            | -        |

| 1000 ns | TM1 | TM2 | TM3       | TM4      | TM5       | TM6       | TM7       |
|---------|-----|-----|-----------|----------|-----------|-----------|-----------|
| TM1     | -   | -   | -         | -        | -         | -         | -         |
| TM2     | -   | -   | A76-S1160 | N72-S152 | -         | -         | D77-R280  |
| TM3     | -   | -   | -         | -        | T110-T197 | -         | Y109-Y278 |
| TM4     | -   | -   | -         | -        | V162-T194 | -         | -         |
| TM5     | -   | -   | -         | -        | -         | S188-R254 | -         |
| TM6     | -   | -   | -         | -        | -         | -         | T243-R280 |

**Table S5.** Polar interactions of DRF motif in CXCR6-CXCL16 CG-MD.

| 0 ns     |                        | 100                                      | 200                    | 300                    | 400                    | 500                    | 600                              | 700                     | 800                              | 900                     | 1000                               |
|----------|------------------------|------------------------------------------|------------------------|------------------------|------------------------|------------------------|----------------------------------|-------------------------|----------------------------------|-------------------------|------------------------------------|
| D12<br>6 | C122,<br>V230          | C122,<br>I129                            | I129,<br>V130          | V130                   | I129,<br>V130,<br>C122 | C122,<br>I129,<br>V130 | *K143,<br>I123,<br>I129,<br>V130 | *K143,<br>C122,<br>V130 | *K143,<br>C122,<br>I129,<br>V130 | *K143,<br>C122,<br>V130 | *K143,<br>C122,<br>I129,<br>V130   |
| R127     | I123,<br>T124,<br>V131 | *L65,<br>A142,<br>I123,<br>T124,<br>T217 | *I123,<br>T124         | *F69,<br>I123          | I123                   | I123,<br>T124          | I123                             | I123,<br>V131           | I123                             | *L65,<br>*T66,<br>I123  | *Y138,<br>*Y288,<br>*S292,<br>I123 |
| F128     | T124,<br>V131,<br>V132 | V132,<br>T217                            | T124,<br>V131,<br>V132 | T124,<br>V131,<br>V132 | T124,<br>V125,<br>V132 | T123,<br>V131,<br>V132 | -                                | T124,<br>V131,<br>V132  | T124,<br>V125,<br>V132           | T123                    | V125                               |

\*Interactions between sidechain of DRF residue. Residues non-polar interacts although mainchain.

**Table S6.** Docking scores and pIC50 of 82 antagonist of CXCR6.

| Complex ID | Docking score (kcal/mol) | pIC50 |
|------------|--------------------------|-------|
| F0-1       | -8.02                    | 5.237 |
| F0-2       | -7.98                    | 4.398 |
| F0-3       | -9.46                    | 4.585 |
| F0-4       | -9.06                    | 4.398 |
| F0-5       | -7.83                    | 4.398 |
| F0-6       | -8.02                    | 4.398 |
| F0-7       | -7.65                    | 5.237 |
| F0-8       | -8.57                    | 5.824 |
| F0-9       | -8.32                    | 5.022 |
| F0-10      | -8.29                    | 4.721 |
| F0-11      | -7.52                    | 4.398 |
| F0-12      | -8.32                    | 4.398 |
| F0-13      | -8.53                    | 4.398 |
| F0-14      | -7.43                    | 4.398 |
| F0-15      | -9.32                    | 4.398 |
| F0-16      | -7.46                    | 6.208 |
| F0-17      | -8.24                    | 6.854 |
| F0-18      | -8.45                    | 6.102 |
| F0-19      | -8.08                    | 5.678 |
| F0-20      | -8.55                    | 6.796 |
| F0-21      | -8.23                    | 6.194 |
| F0-22      | -7.56                    | 6.032 |
| F0-23      | -8.68                    | 5.796 |
| F0-24      | -8.17                    | 6.076 |
| F0-25      | -8.08                    | 6.387 |
| F0-26      | -8.85                    | 6.456 |
| F0-27      | -8.44                    | 5.745 |
| F0-28      | -7.91                    | 5.237 |
| F0-29      | -8.82                    | 6.796 |
| F0-30      | -8.78                    | 6.796 |
| F0-31      | -7.48                    | 5.947 |
| F0-32      | -8.09                    | 4.418 |

|       |        |       |
|-------|--------|-------|
| F0-33 | -7.8   | 6.456 |
| F0-34 | -8.79  | 5.609 |
| F0-35 | -7.39  | 6.215 |
| F0-36 | -7.91  | 4.398 |
| F0-37 | -8.98  | 4.301 |
| F0-38 | -8.5   | 4.301 |
| F0-39 | -8.14  | 4.301 |
| F0-40 | -8.62  | 4.398 |
| F0-41 | -8.5   | 4.398 |
| F0-42 | -7.69  | 4.398 |
| F0-43 | -7.27  | 4.398 |
| F0-44 | -9.49  | 4.398 |
| F0-45 | -7.88  | 4.398 |
| F0-46 | -8.67  | 4.398 |
| F0-47 | -8.32  | 4.398 |
| F0-48 | -8.79  | 4.398 |
| F0-49 | -9.58  | 4.398 |
| F0-50 | -8.01  | 4.577 |
| F0-51 | -8.17  | 4.076 |
| F0-52 | -8.95  | 4.319 |
| F0-53 | -9.79  | 4.31  |
| F0-54 | -8.35  | 4.301 |
| F0-55 | -8.75  | 4.292 |
| F0-56 | -9.14  | 4.284 |
| F0-57 | -8.28  | 4.301 |
| F0-58 | -7.88  | 4.301 |
| F0-59 | -7.7   | 4.301 |
| F0-60 | -7.52  | 5.167 |
| F0-61 | -8.11  | 5.022 |
| F0-62 | -7.4   | 4.625 |
| F0-63 | -8.79  | 5.469 |
| F0-64 | -8.63  | 5.174 |
| F0-65 | -9.83  | 4.625 |
| F0-66 | -9.42  | 4.301 |
| F0-67 | -9.89  | 4.301 |
| F0-68 | -10.39 | 6.046 |
| F0-69 | -10.26 | 6.523 |
| F0-70 | -10.08 | 5.161 |
| F0-71 | -9.94  | 4.979 |
| F0-72 | -9.67  | 4.301 |
| F0-73 | -9.37  | 4.896 |
| F0-74 | -9.31  | 6.886 |
| F0-75 | -10.74 | 6.77  |
| F0-76 | -8.79  | 6.569 |
| F0-77 | -9.88  | 6.585 |
| F0-78 | -9.82  | 6.959 |
| F0-79 | -10.71 | 6.602 |
| F0-80 | -10.57 | 5.509 |
| F0-81 | -10.08 | 7.097 |
| F0-82 | -8.92  | 7.398 |



**Table S7.** General protein-ligand nteraction model coordinates.

| Name             | X          | Y          | Z          | pIC50      |
|------------------|------------|------------|------------|------------|
| HydrogenAcceptor | 59.3727714 | 65.3909095 | 84.6451686 | 0.35058078 |
| HydrogenDonor    | 68.0164846 | 62.7024904 | 78.145012  | 0.49724503 |
| Hydrophobic      | 61.415877  | 64.3341687 | 84.2736825 | 0.23059505 |
| Hydrophobic      | 59.6718027 | 64.7809546 | 84.5175079 | 0.92742875 |
| HydrogenAcceptor | 64.834003  | 62.398006  | 86.2247568 | 0.65716015 |
| HydrogenDonor    | 64.1215167 | 71.7991167 | 87.7533    | 0.59623049 |

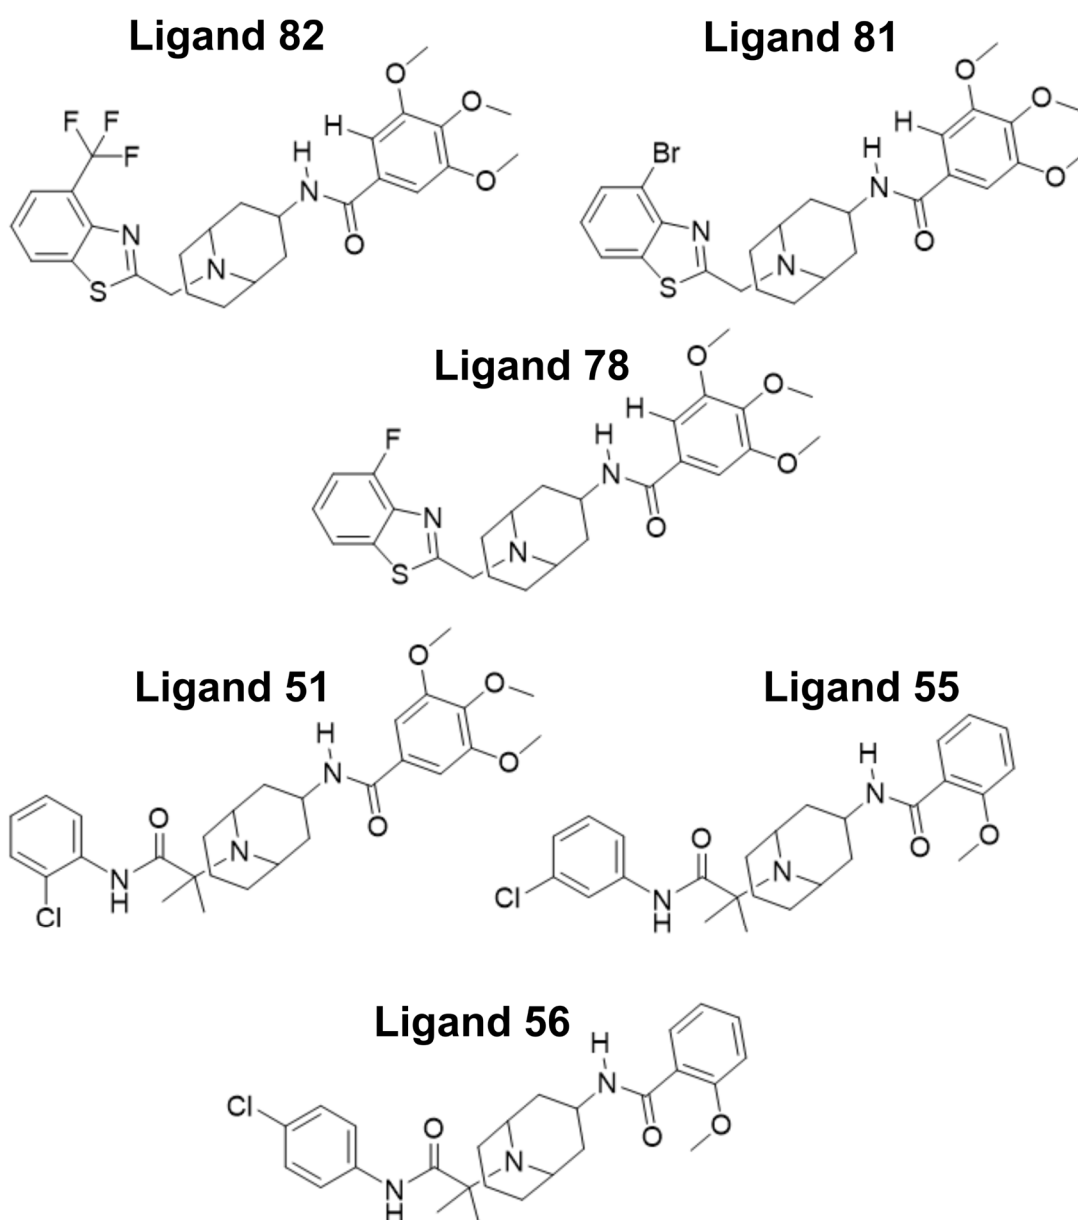

**Figure S7.** 2D structure of three best and three worst ligands.

**Table S8.** Statistical values of QSAR models.

| <b>Models</b> | <b>q<sup>2</sup></b> | <b>R<sup>2</sup></b> | <b>F-Test</b> | <b>Test-group</b>                                                                         |
|---------------|----------------------|----------------------|---------------|-------------------------------------------------------------------------------------------|
| Model1        | 0.6329               | 0.8639               | 67.2740       | 33, 30, 39, 22, 61, 28, 36, 53, 9, 66, 56, 59, 24, 48, 72, 18, 2, 52, 13, 41, 62, 46, 75  |
| Model2        | 0.6066               | 0.8427               | 56.7877       | 52, 3, 24, 19, 29, 76, 32, 34, 28, 26, 2, 80, 59, 14, 49, 61, 53, 7, 42, 46, 81, 47, 66   |
| Model3        | 0.5307               | 0.8076               | 63.7844       | 2, 1, 66, 52, 64, 34, 74, 65, 16, 14, 29, 32, 46, 3, 23, 62, 59, 54, 26, 59, 36, 49, 81   |
| Model4        | 0.4906               | 0.8718               | 72.0608       | 27, 50, 25, 9, 2, 23, 14, 67, 41, 70, 33, 28, 39, 79, 66, 36, 13, 1, 71, 55, 82, 3, 76    |
| Model5        | 0.5178               | 0.8637               | 67.1780       | 4, 80, 39, 29, 28, 37, 26, 53, 25, 58, 55, 77, 54, 23, 31, 69, 19, 7, 70, 64, 16, 81, 34  |
| Model6        | 0.2146               | 0.8054               | 43.8604       | 18, 31, 1, 30, 77, 22, 7, 3, 71, 49, 58, 28, 79, 14, 24, 25, 55, 20, 51, 56, 17, 34, 57   |
| Model7        | 0.6397               | 0.8731               | 72.8980       | 18, 74, 38, 2, 72, 80, 28, 52, 16, 15, 12, 73, 70, 26, 47, 13, 32, 54, 65, 62, 59, 79, 56 |
| Model8        | 0.5430               | 0.8624               | 66.4102       | 6, 69, 80, 44, 36, 55, 58, 39, 15, 7, 46, 24, 41, 53, 32, 51, 29, 45, 82, 78, 20, 79, 40  |
| Model9        | 0.5340               | 0.8479               | 59.1133       | 20, 79, 42, 29, 40, 75, 9, 77, 41, 28, 19, 59, 15, 62, 50, 43, 69, 17, 31, 53, 21, 76, 66 |
| Model10       | 0.5404               | 0.8264               | 50.4763       | 23, 52, 30, 31, 14, 24, 32, 22, 16, 27, 3, 65, 72, 36, 46, 45, 51, 15, 6, 55, 12, 43, 75  |
